# Supplementary material for: A close look at using national ground stations for the statistical modeling of NO 2
Source: Copernicus journal article supplement (doi:10.5194/egusphere-2023-1260), 2023-10-23
Supplement: Supplementary file 1 [file Supplementary - Table01 - initial dataset Lu et al_2020.xlsx]

## Sheet: Blad1
Variable	Data	Unit	Location	Time	Source
road_class_1	total length of highway	m (25m-, 50m-, 100m-, 300m-, 1000m-, 3000m-, 5000m-buffers)	The Netherlands, Germany	2017	OpenStreetMap par
road_class_2	total length of primary roads	m (25m-, 50m-, 100m-, 300m-, 1000m-, 3000m-, 5000m-buffers)	The Netherlands, Germany	2017	OpenStreetMap
road_class_3	total road length of local roads	m (25m-, 50m-, 100m-, 300m-, 1000m-, 3000m-, 5000m-buffers)	The Netherlands, Germany	2017	OpenStreetMap
industry	area of industry	m$^2$ (25m-, 50m-, 100m-, 300m-, 1000m-, 3000m-, 5000m-buffers)	The Netherlands, Germany	2017	OpenStreetMap
wind	Monthly wind speed measured at 10 m altitude, for each month of the year.	km/hr	The Netherlands, Germany	2017	ERA-Interim
temperature	Monthly temperature measured at 2 m altitude, for each month of the year.	Celsius	The Netherlands, Germany	2017	ERA-Interim
OMI_mean_filt	annual mean vertical column density (level 3 product)	mol/cm$^2$	The Netherlands, Germany	2017	Earthdata
TROPOMI	TROPOMI vertical column density (level 3 product), mean of monthly average from 2018/02–2019/01	mol/cm$^2$	The Netherlands, Germany	2018 - 2019	Tropomi
RSP	Remote sensing product generated from SCIAMACHY, GOME-2, global GEOS-Chem, 2011	μgm/m$^3$	The Netherlands, Germany	2011	SCIAMACHY
population	Global Human Settlement Layer population grid	count (absolute) (1000m-, 3000m-, 5000m-buffers)	The Netherlands, Germany	2015
