# Supplementary material for: A close look at using national ground stations for the statistical modeling of NO 2
Source: Copernicus journal article supplement (doi:10.5194/egusphere-2023-1260), 2023-10-23
Supplement: Supplementary file 2 [file Supplementary - Table02 - Performance local models_spatial groupings_CV20.xlsx]

## Sheet: Blad1
			Urban			Low Population			Far From Road
Models			R$^2$	RMSE	MAE	R$^2$	RMSE	MAE	R$^2$	RMSE	MAE
Non linear	Random forest	Mean	-0.07	7.603	6.606	0.373	6.436	4.821	-0.208	7.511	6.515
		Standard deviation	0.38	1.091	0.996	0.278	2.144	1.639	0.802	1.094	1.071
	Lightgbm	Mean	-0.134	7.802	6.627	0.337	6.448	5.25	-0.251	7.743	6.518
		Standard deviation	0.425	1.043	0.941	0.336	1.788	1.38	0.726	1.462	1.279
	Xgboost	Mean	-0.398	8.495	6.824	0.347	6.341	4.542	-1.148	9.931	8.037
		Standard deviation	0.669	1.327	1.12	0.424	2.283	1.473	1.574	1.621	1.187
Linear	Ridge	Mean	-0.003	7.518	6.437	0.421	6.171	4.428	-0.276	7.62	6.685
		Standard deviation	0.257	1.327	1.214	0.229	1.859	1.276	0.942	1.078	0.996
	Lasso	Mean	-0.03	7.564	6.466	0.407	6.121	4.392	-0.334	7.717	6.637
		Standard deviation	0.297	1.216	1.153	0.309	1.791	1.304	1.046	1.197	1.108
